# Supplementary material for: Type of E-Cigarette Device Used Among Adolescents and Young Adults: Findings From a Pooled Analysis of Eight Studies of 2166 Vapers
Source: Oxford University Press journal article supplement (doi:10.1093/ntr/ntx069), 2017-03-21
Supplement: ntx069_suppl_supplemental_tables_r1.pdf [file ntx069_suppl_supplemental_tables_r1.pdf]

## SUPPLEMENTAL TABLES

Supplemental Table 1. Study characteristics and prevalence of e-cigarette use in the past 30 days

| Study            | Location      | Date of Collection | Survey method | Overall Study N | Past 30-day E-cigarette Use |      | Age range* | %Male* | Race/Ethnicity*† |       |      |       |       |
|------------------|---------------|--------------------|---------------|-----------------|-----------------------------|------|------------|--------|------------------|-------|------|-------|-------|
|                  |               |                    |               |                 | % (95%CI)                   | N    |            |        | W                | H     | B    | A     | O     |
| 1 <sup>a,c</sup> | United States | 12/2014 – 6/2016   | Phone         | 2021            | 12.8% (10.8%, 15.1%)        | 259  | 13-26      | 58.6%  | 62.8%            | 15.4% | 8.3% | 1.1%  | 12.3% |
| 2 <sup>a,d</sup> | United States | 8/2015 – 9/2015    | Online        | 933             | 9.3% (7.2%, 12.0%)          | 97   | 18-29      | 50.3%  | 58.8%            | 19.3% | 9.7% | 0%    | 12.1% |
| 3 <sup>b,e</sup> | California    | 9/2015 – 12/2015   | Paper         | 2924            | 6.0% (5.2%, 6.9%)           | 175  | 15-16      | 55.2%  | 22.2%            | 39.5% | 4.2% | 13.8% | 24.0% |
| 4 <sup>b,f</sup> | California    | 1/2015 – 7/2016    | Online        | 1553            | 13.2% (11.6%, 15.1%)        | 192  | 18-21      | 58.3%  | 49.0%            | 42.7% | 0%   | 2.6%  | 5.7%  |
| 5 <sup>b,g</sup> | California    | 2/2016 – 6/2016    | Online        | 631             | 5.9% (4.4%, 7.7%)           | 46   | 14-20      | 50.0%  | 26.1%            | 32.6% | 0%   | 23.9% | 17.4% |
| 6 <sup>b,h</sup> | Texas         | 10/2015 – 1/2016   | Online        | 2707            | 3.5% (2.8%, 4.3%)           | 95   | 10-17      | 53.7%  | 43.1%            | 9.5%  | 6.3% | 5.3%  | 35.8% |
| 7 <sup>b,i</sup> | Texas         | 10/2015-11/2015    | Online        | 4282            | 12.3% (11.4%, 13.3%)        | 527  | 19-29      | 47.8%  | 39.3%            | 34.3% | 4.0% | 13.5% | 8.9%  |
| 8 <sup>b,j</sup> | Connecticut   | 10/2015 – 6/2015   | Paper         | 7045            | 12.1% (11.3%, 12.9%)        | 775  | 13-20      | 55.9%  | 65.9%            | 11.6% | 6.2% | 2.6%  | 13.3% |
| <b>Summary</b>   |               | 12/2014 – 7/2016   |               | 22,096          |                             | 2166 | 10-29      |        |                  |       |      |       |       |

\*Restricted to e-cigarette users

†W = non-Hispanic White; H = Hispanic; B = non-Hispanic Black; A = non-Hispanic Asian; O = other

<sup>a</sup>95%CI for all estimates computed from a Wald-type interval on the log-odds scale obtained from a weighted logistic regression model that is transformed to the probability scale

<sup>b</sup>95%CI for all estimates computed using Wilson method

<sup>c</sup>National probability sample; % reported are weighted to be demographically representative of the US 2014 population, using the Current Population Survey March 2014 Supplement<sup>15</sup>

<sup>d</sup>National probability sample; % reported are weighted to be demographically representative of the US 2015 population, using the Current Population Survey March 2015 Supplement<sup>20</sup>

<sup>e</sup>School based cohort; Los Angeles county<sup>9</sup>

<sup>f</sup>School-based cohort, Southern California<sup>10</sup>

<sup>g</sup>School-based cohort, Northern California<sup>16</sup>

<sup>h</sup>School-based cohort, Houston, Dallas/Fort Worth, San Antonio, Austin; sample weighted to the state of Texas, weighted % reported<sup>18</sup>

<sup>i</sup>School-based cohort (college), Houston, Dallas/Fort Worth, San Antonio, Austin<sup>19</sup>

<sup>j</sup>School-based cohort, south East Connecticut<sup>17</sup>

†Significant heterogeneity observed (p<0.05)

Supplemental Table 2. Questions assessing type of device used for each study

| Study | Questions Assessing Device Type                                                                                                                                                                                                                                                                                                                                                                                                                                                                  | Photo? | Select all that apply? |
|-------|--------------------------------------------------------------------------------------------------------------------------------------------------------------------------------------------------------------------------------------------------------------------------------------------------------------------------------------------------------------------------------------------------------------------------------------------------------------------------------------------------|--------|------------------------|
| 1     | 1) Did most of the e-cigarettes or vape pens you used in the past 30 days look a lot like a cigarette?                                                                                                                                                                                                                                                                                                                                                                                           | No     | No                     |
| 2     | 1) Was your electronic vapor product rechargeable?<br>2) Did your electronic vapor product use cartridges?<br>3) Did your electronic vapor product use a tank system?                                                                                                                                                                                                                                                                                                                            | Yes    | No                     |
| 3     | 1) If you have owned an e-cigarette device, which of the following best describes the e-cigarette device you normally used?                                                                                                                                                                                                                                                                                                                                                                      | No     | No                     |
| 4     | 1) In the past 30 days, which device did you use most often?                                                                                                                                                                                                                                                                                                                                                                                                                                     | No     | No                     |
| 5     | 1) On average, when you use electronic cigarettes/E-cigs/Vapes/vape pens/vapor pens, which of the following do you use?                                                                                                                                                                                                                                                                                                                                                                          | Yes    | Yes                    |
| 6     | 1) During the past 30 days, what type of electronic cigarette, vape pen, or e-hookah did you use? Refer to the photo above for examples.<br>a) A disposable electronic cigarette that you throw out when it is empty.<br>b) A rechargeable electronic cigarette used with replaceable cartridges.<br>c) A rechargeable electronic cigarette used with refillable e-juice/e-liquid.                                                                                                               | Yes    | Yes                    |
| 7     | 1) Disposable: During the past 30 days, have you used a disposable e-cigarette or an e-cigarette with a disposable nicotine cartridge? Neither requires the addition of e-liquid/e-juice.<br>2) Vape/Pen: During the past 30 days, have you used a vape pen, personal vaporizer, or any other device as intended (i.e. with nicotine e-liquid/e-juice)?<br>3) Mod/Rebuildable: During the past 30 days, have you used a portable mod, rebuildable, or other "3 <sup>rd</sup> generation" device? | Yes    | Yes                    |
| 8     | 1) Does the e-cigarette you usually use have tanks or cartridges to hold the e-liquid?                                                                                                                                                                                                                                                                                                                                                                                                           | Yes    | No                     |
